# Supplementary material
Source: PubMed Central journal article supplement (PMC5671782)

# GRAPHICAL ABSTRACT

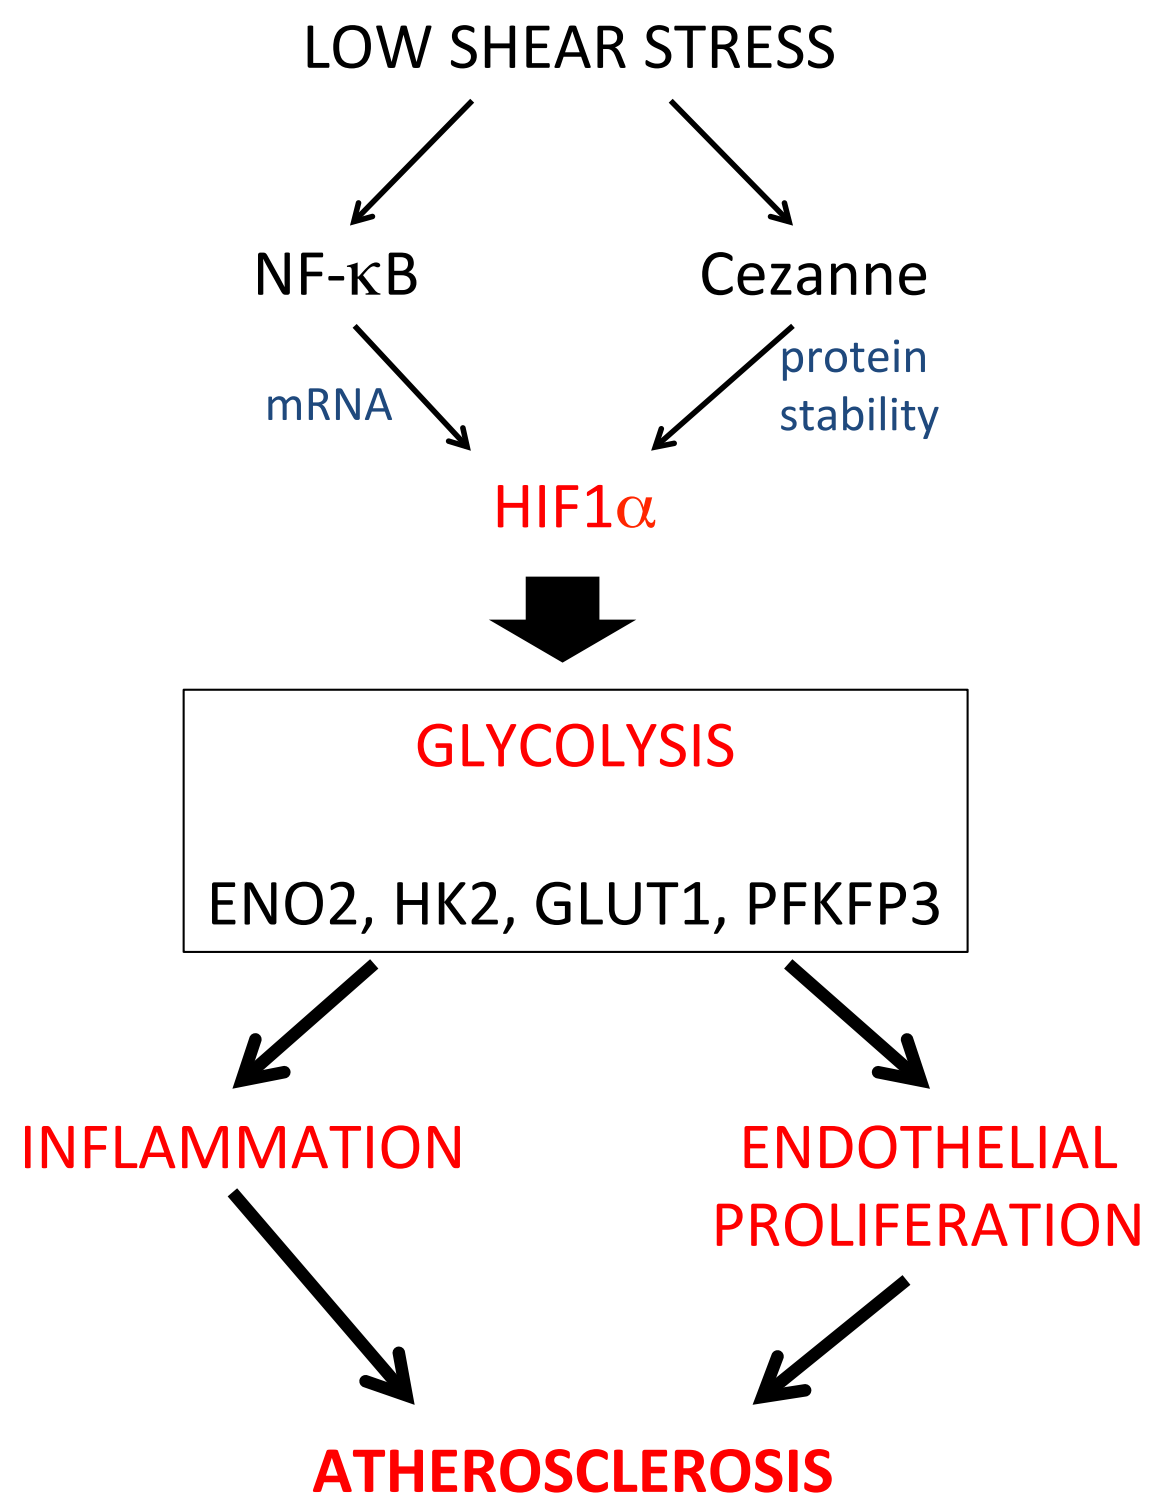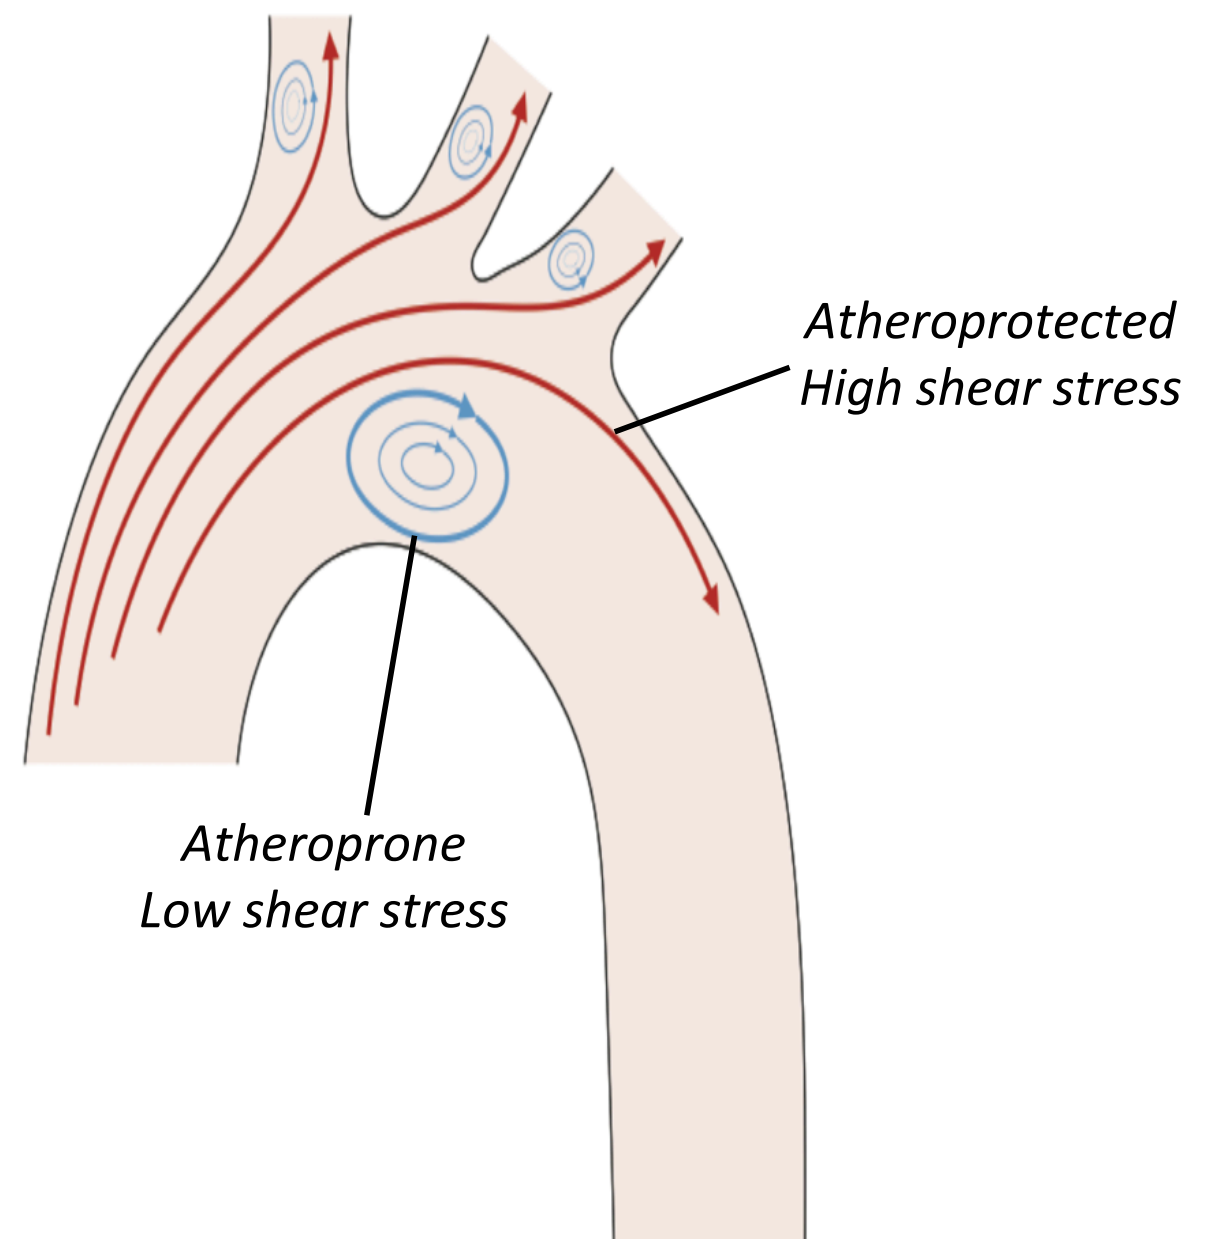

Supplement: atv-37-2087-s001.pdf [file atv-37-2087-s001.pdf]
